RESEARCH ARTICLE

# Social experience and social cohabitation with mating promote spinogenesis in the nucleus accumbens of adult female prairie voles (*Microtus ochrogaster*)

Analia E. Castro<sup>1,2</sup>, Marco A. López-Quiroz<sup>1,3</sup>, Daniela Ávila-González<sup>4</sup>, Francisco J. Camacho<sup>1</sup>, Raúl G. Paredes<sup>1,2</sup>, Néstor F. Díaz<sup>4</sup>, Wendy Portillo<sup>1\*</sup>

**1** Instituto de Neurobiología, Universidad Nacional Autónoma de México (UNAM), Querétaro, México, **2** Escuela Nacional de Estudios Superiores, Unidad Juriquilla, UNAM, Querétaro, México, **3** Instituto de Ciencias de la Atmósfera y Cambio Climático, UNAM, México, México, **4** Instituto Nacional de Perinatología, México, México

\* [portillo@unam.mx](mailto:portillo@unam.mx)

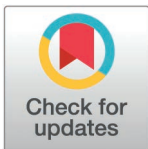

**OPEN ACCESS**

**Citation:** Castro AE, López-Quiroz MA, Ávila-González D, Camacho FJ, Paredes RG, Díaz NF, et al. (2025) Social experience and social cohabitation with mating promote spinogenesis in the nucleus accumbens of adult female prairie voles (*Microtus ochrogaster*). PLoS One 20(11): e0335626. <https://doi.org/10.1371/journal.pone.0335626>

**Editor:** Juan M Dominguez, University of Texas at Austin, UNITED STATES OF AMERICA

**Received:** June 25, 2025

**Accepted:** October 14, 2025

**Published:** November 3, 2025

**Copyright:** © 2025 Castro et al. This is an open access article distributed under the terms of the [Creative Commons Attribution License](https://creativecommons.org/licenses/by/4.0/), which permits unrestricted use, distribution, and reproduction in any medium, provided the original author and source are credited.

**Data availability statement:** All relevant data are within the manuscript and its [Supporting information](#) files.

**Funding:** A.E.C was supported by postdoctoral fellowships from RETENCION-CONACYT

## Abstract

Prairie voles (*Microtus ochrogaster*) are monogamous rodents that establish life-long pair-bonds and display characteristic social and biparental care behaviors. Since social and sexual experiences modulate brain plasticity, the present study aimed to elucidate in female voles if social exposure to a male or social cohabitation with mating, which leads to pair-bonding, modulates spinogenesis processes in the medium spiny neurons (MSNs) in the nucleus accumbens (NAc). Females were randomly assigned to one of the following groups: 1) control (C), voles that cohabited with a familiar female in a clean cage; 2) social exposure (SE), voles housed in a cage divided into two equal compartments by an acrylic screen with small holes. The experimental female was placed in one of the compartments, and a male in the opposite one. Therefore, females were exposed to sensory cues from an adult male. Still, physical contact and copulation were not allowed, and 3) social cohabitation with mating (SCM) females were allowed to mate to induce pair-bonds. The NAc core and shell were processed for Golgi-Cox staining. Our results showed that MSN from SE and SCM groups had higher spine density than C females and a differential density of spine subtypes in the core and shell. Furthermore, only the SE condition induced an increment in MSN dendritic length and arborization in the core and shell regions. These findings demonstrate that males' sexual cues and mating that promote pair-bonding modulate spinogenesis in the NAc and contribute to understanding the neuronal plasticity mechanism involved in pair-bonding in prairie voles.

and Estancias Posdoctorales por México-CONAHCYT programs <https://secihti.mx/becas-posgrados/estancias-posdoctorales-nacionales/>. This research was supported by grants CONACYT CF-2023-G-206 (W.P) <https://secihti.mx/convocatorias/convocatorias-ciencia-basica-y-de-frontera/convocatoria-ciencia-de-frontera-2023/>, UNAM-DGAPA-PAPIIT IN204824 (W.P) and IN214524 (R.P) <https://dgapa.unam.mx/index.php/impulso-a-la-investigacion/papiit>; INPER 2022-1-13 (N.F.D) <https://www.inper.mx/>. The funders had no role in study design, data collection and analysis, decision to publish, or preparation of the manuscript.

**Competing interests:** No authors have competing interests.

## Introduction

Prairie voles (*Microtus ochrogaster*) are socially monogamous rodents that form stable pair-bonds after 24 h of cohabitation without mating or after 6 h when mating occurs, these bonds are subsequently maintained long term [1–3]. Pair-bonding is manifested by partner preference, territorial and nest defense, mate guarding, and biparental care of offspring [4,5]. These traits make prairie voles an excellent model for investigating the neural basis of social monogamy.

Social experience and mating that lead to pair-bonding formation induce neuronal plasticity in adult voles. Documented mechanisms include alterations in gene expression, synaptic activity, circuit dynamics, adult neurogenesis, and epigenetic modifications [6–10].

The mesolimbic reward system, specifically the nucleus accumbens (NAc), processes socio-sexual stimuli in mammals. Located in the ventral forebrain, the NAc regulates reward, motivation, reproductive behavior, drug addiction, food intake, stress-related behavior, among others [11–15]. Anatomically and functionally, the NAc comprises core and shell subregions. The core is associated with motivation, conditioned responses, and associative learning; whereas the shell processes primary rewards, aversive stimuli, and unconditioned aspects of motivated behavior [16–22]. Distinct medium spiny neuron (MSN) subpopulations within these subregions confer unique intrinsic properties.

Multiple lines of evidence implicate the NAc in pair-bond formation and maintenance [23–26]. Chemogenetic inhibition of the NAc via Designer Receptors Exclusively Activated by Designer Drugs (DREADDs) diminishes partner preference [27]. Dopamine in the NAc regulates pair-bond dynamics through differential expression and activity of D1- and D2-like receptors in male voles [24]. Partner seeking, anticipation of partner access and interaction, elevates NAc dopamine release, an effect not elicited by exposure to novel conspecific or food; prolonged partner separation (four weeks) decreases dopamine release [28]. In female voles, up-regulation of oxytocin receptors facilitates partner preference [29]; whereas NAc specific knock-down of the receptor disrupts partner preference formation [30]. Thus, dopaminergic and oxytocinergic signaling converge in the NAc to consolidate social monogamy in voles [31]. Resting-state functional magnetic resonance imaging further reveals functional connectivity between the NAc and other brain regions during affiliative behavior; including pair-bonding and huddling [7].

MSN constitutes the predominant neural population in both NAc core and shell and modulates reward and aversion [32]. Although dopaminergic inputs dominate, intrinsic GABAergic networks and cholinergic interneurons also shape MSN electrophysiology in rats [33,34].

Neuronal plasticity in the NAc is reflected morphologically by alterations in MSN dendritic arborization and spine density. Such plasticity underlines learning, memory [35], and addiction to opioids, cocaine, and alcohol [36,37]. For instance, in rats, cocaine administration increases dendritic spine density on D1-expressing MSN [38–40], whereas prolonged opioid self-administration reduces dendritic branching and spiny density [41]. In rats, prenatal alcohol exposure decreases dendritic length and branching, though not spine density [42].

Dendritic spines -small protrusions that form the postsynaptic component of excitatory synapses- comprise a neck and a bulbous head [43–45]. Based on head morphology and length, spines are classified as filopodia, long-thin, thin, stubby, mushroom, or branched; larger heads correlate with greater synaptic strength [44,46–49]. We investigated whether social and socio-sexual interactions that induce pair-bonding modulate spinogenesis in the NAc of adult female voles. We hypothesize that these interactions would increase dendritic spine density and favors mature morphologies on NAc MSN.

## Materials and methods

### Animals

Adult prairie voles were bred in our local colony at Instituto de Neurobiología, UNAM, from founders provided by Dr. Larry J. Young (Emory University). Animals were maintained on a 14h/10h light/dark cycle (lights on 08:00h) with *ad libitum* access to food (rabbit high-fiber diet 5326 LABDIET, oats, and sunflower seeds) and water. BVSc Francisco J Camacho maintained the animal colony, who also trains our staff involved in animal research. All procedures conformed to the “Reglamento de la Ley General de Salud en Materia de Investigación para la Salud” of the Mexican Health Ministry, and NIH guidelines. The protocol was approved by the Institutional Ethics Animal Care Committee of the Instituto de Neurobiología (protocol 072) and the Committee of Ethics Animal care of the Instituto Nacional de Perinatología (protocol 2022-1-13). All surgery was performed under a solution of ketamine (60 mg/Kg) and xylazine (4 mg/Kg) diluted in 0.9% NaCl; all efforts were made to minimize suffering. Animal health and behavior were monitored daily.

### Experimental design

Sexually naïve females (3–4 months) and stimulus males were used. Males were gonadally intact, females were bilaterally ovariectomized on Day 0, monitored and cleaned with antiseptic solution Microdacyn (Na < 55 ppm, Cl < 80 ppm. SanFer, México) and allowed to recovery for 7 days (Days 1–7). To induce sexual receptivity, females received estradiol benzoate (EB, 0.5 µg/vole, s.c., Sigma Aldrich) once daily for four consecutive days (Days 8–11) [50–52]. On Day 11, immediately after the fourth EB injection, the 6h behavioral session began (t=0). Females were randomly assigned to three experimental conditions (Fig 1). 1) Control (C, n=7), housed with a familiar female in a standard clean acrylic cage (20 x 46 x 25 cm). 2) Social exposure (SE, n=6), each female and an unfamiliar male were placed in a standard acrylic cage divided into two equal compartments by a perforated acrylic barrier that permitted visual, auditory, and olfactory, but

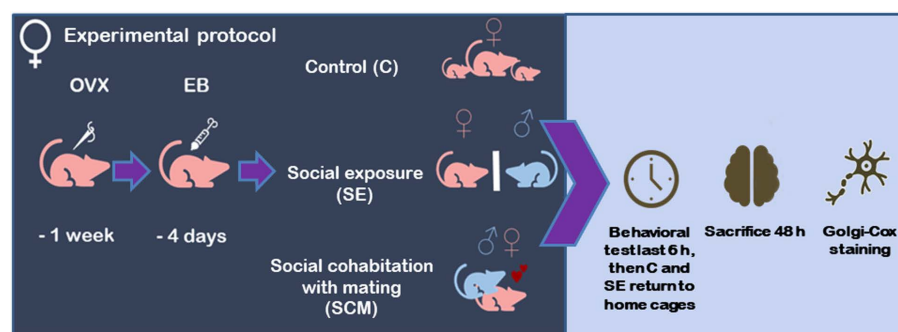

**Fig 1. Experimental design.** Sexually naïve female prairie voles were bilaterally ovariectomized (OVX). After a 7-day recovery, animals received subcutaneous estradiol-benzoate injections (EB; 0.5 µg day) for four consecutive days to induce sexual receptivity. Females were then randomly assigned to one of three conditions: 1) Control (C) housed with a conspecific females; 2) Social exposure (SE), a female and an unfamiliar male were placed in opposite compartments of a divided cage, separated by a perforated acrylic barrier, permitting visual, acoustic and olfactory contact but not physical interaction; 3) Social cohabitation with mating (SCM), a female cohabited freely with a male, allowing unrestricted interaction and copulation. The behavioral session lasted six hours. Females from the SE were then returned to their original cages, whereas C and SCM pairs remained together until euthanasia. All subjects were sacrificed 48h after the onset of the behavioral test.

<https://doi.org/10.1371/journal.pone.0335626.g001>

not physical, contact. Across repeated implementations of this test in our laboratory, animals typically exhibited sustained social investigation at the divider (sniffing), with some biting or attempts to breach the barrier. While these qualitative observations suggest that hyperlocomotion is not the dominant state. 3) Social cohabitation with mating (SCM, n=6), a female cohabited freely with an unfamiliar male, allowing interaction and mating (a condition known to accelerate pair-bonding).

Twelve males served as stimulus animals. After the 6 h session, SE and C females were returned to their home cages, SE females were returned to their sibling cages, because pair-bonds form after 24 h of non-mating cohabitation [2]. In contrast, SCM pairs remained together until euthanasia. All females were euthanized 48 h after the start of the behavioral session (Day 13) by decapitation. This was necessary to obtain the brains to process for Golgi-Cox staining. No deaths, symptoms of disease, or discomfort occurred during the 13-day experimental timeline. Stimulus males were returned to the colony for use in other experiments.

**Pairing conditions and verification of mating.** At t=0, each EB-primed, ovariectomized SCM female was first introduced to an unfamiliar, non-sibling male; pairs were drawn from different home cages and had no prior cohabitation or physical interactions. Male sexual behavior during the first hour was scored by a trained observer using a predefined ethogram (mount, intromission, ejaculation). For each pair, we recorded latencies to first mount, intromission, and ejaculation. And the number of mounts and intromissions. As summarized in Table 1, all males (n=6) ejaculated at least once within the first hour, confirming consummatory interaction at session onset.

### Tissue processing and Golgi-Cox staining

Prairie voles were euthanized by decapitation. Heads were chilled on ice for 15 min to minimize tissue degradation, brains were extracted, rinsed in ice-cold PBS (10 min), and incubated in PBS containing heparin (1000 IU ml<sup>-1</sup>, 1:1000; 10 min) until incubation with the staining Golgi-Cox kit solutions.

Brains were sectioned into four blocks using an adult mouse brain matrix and processed with the FD Rapid GolgiStain™ kit (#PK 401, FD NeuroTechnologies, INC) following the manufacturer’s protocol with minor modifications. Blocks were immersed in impregnation solution (equal parts solution A and B; prepared 24 h in advance) for two weeks at room temperature (RT) in darkness, with solution refreshment on the second day of incubation.

Brain blocks were transferred to solution C for 72 h (solution refreshed after 24 h), then sectioned coronally at 100 μm on a vibratome (OTS-5000 Electron Microscopy Sciences). Sections were collected in 0.1 M PBS, mounted on gelatin-coated slides, and air-dried overnight. Slices were incubated in staining solution (solutions D and E mixed 1:1 and diluted 1:2 with distilled water) for 6 min at RT, rinsed twice in water (5 min each), dehydrated through graded ethanols (50%, 70%, 95%, 100%; 5 min each), cleared with xylene (5 min), cover-slipped with Permount (Fisher Chemical), and stored in darkness at room temperature.

**Table 1. Sexual behavior parameters displayed by the social cohabitation with mating group and registered during the first 1 h of the behavioral test (n=6).**

| Sexual parameter | Range | Max   | Min   | Median | 25%   | 75%   |
|------------------|-------|-------|-------|--------|-------|-------|
| MN               | 11    | 16    | 5     | 8.5    | 5.75  | 14.5  |
| IN               | 2     | 7     | 5     | 5.5    | 5     | 6.25  |
| EN               | 0     | 1     | 1     | 1      | 1     | 1     |
| ML               | 513.6 | 694.2 | 180.6 | 264    | 184.7 | 410.3 |
| IL               | 2132  | 2642  | 510   | 1451   | 552.8 | 2472  |
| EL               | 637.8 | 2472  | 1834  | 2130   | 1834  | 2472  |

Number of mounts (MN), intromissions (IN), and ejaculations (EN). Latency of mount (LM), intromission (LI) and ejaculation (LE).

<https://doi.org/10.1371/journal.pone.0335626.t001>

## Spine imaging and 2D morphometry (Golgi-Cox)

NAC core and shell boundaries and the Bregma levels used to guide section selection are schematized in [Fig 2A](#), C, E and G (adapted atlas as noted in the legend). These coordinates guided the selection of brain sections to Golgi-Cox processing [Fig 2B](#), D, F and H. Golgi-Cox impregnated coronal sections (100  $\mu\text{m}$ ) were imaged under an Olympus BX60 microscope using an immersion 100X oil-immersion objective. For each neuron, secondary dendrites were identified in both hemispheres and examined with fine through-focus to verify a single best-focus plane. To minimize out-of-plane artefacts, we include only dendritic segments oriented approximately parallel to the image plane and exclude segments that traversed sharply in z (e.g., entered/left focus within the 10  $\mu\text{m}$  analysis window). Images were analyzed in Image J/ Fiji with a pixel-to-microscope scale bar.

**Inclusion criteria and blinding.** Only protrusions with a clearly resolvable neck and head (when present) in a single best-focus frame were measured; ambiguous profiles were excluded *a priori*. Spine tracing and subtyping were performed blind to the experimental group by a trained analyst; a second analyst performed periodic cross-checks on randomly selected fields to ensure consistency.

Measurement rules and operational definitions [47]. For each spine, we measured height (H), distance from the dendritic shaft to the distal tip along the neck axis, and the head width (W), maximum diameter of the head (when present), and computed H/W. Subtypes were assigned using a pre-specified decision tree to avoid rule overlap: 1) Branched a single neck giving rise to  $\geq 2$  protrusions; 2) Mushroom  $W > 0.6 \mu\text{m}$ , irrespective of H; 3) Filopodium:  $H > 2.0 \mu\text{m}$  with no bulbous head; 4) Long-thin:  $H > 1.0 \mu\text{m}$  and  $H/W > 1.0$  (head present but narrow); 5) Thin  $H/W > 1.0 \mu\text{m}$  with  $H < 1.0 \mu\text{m}$  and 6) Stubby:  $H/W \leq 1.0$ . Spine density was quantified per 10  $\mu\text{m}$  dendritic segment; percentages were computed as subtype counts divided by total spines per segment. Only spines meeting the inclusion criteria were counted ([Fig 4](#)). For spine-subtype analyses, a random subset of five females per group was analyzed and five neurons per NAc were analyzed. C (core = 25 neurons; shell = 25); SE (core = 25; shell = 25); SCM (core = 25; shell = 25).

## Morphological analyses

Dendritic length, branching, and soma diameter were measured using Image J/Fiji software analysis from images taken with a 40X objective. Dendritic length was traced from soma to segment terminus. Because prairie vole MSNs exhibit limited arborization (rarely beyond third-order branches; [Fig 5A](#)), branching was quantified as first-order bifurcations. Soma diameter was measured using the microscope scale bar as a reference. Sample sizes: C = 7 females five neurons per NAc region were analyzed (core = 35 neurons; shell = 35); SE = 6 (core = 30; shell = 30) and SCM = 6 (core = 30; shell = 30).

## Statistical analysis

Data were analyzed in GraphPad Prism 8 (GraphPad Software, San Diego, CA, USA). Normality was assessed with the Shapiro-Wilk test. Sexual behavior variables did not have a normal distribution; therefore, median, minimum, maximum, range, and 25th/75th percentiles are reported in [Table 1](#). Dendritic spine density and morphological parameters had a normal distribution. They were analyzed with one-way ANOVA followed by Bonferroni's *post hoc* tests. Data are presented as means  $\pm$  SEM;  $p \leq 0.05$  was considered significant.

## Results

### Mating verification and dendritic spine density

To confirm sexual interaction in the SCM condition, we quantified male sexual behavior during the first hour ([Table 1](#)); all males ejaculated at least once, verifying that mating occurred at the start of the session. Representative Golgi-Cox micrographs of MSN in the NAc core and shell are shown for each experimental group in [Fig 3A](#).

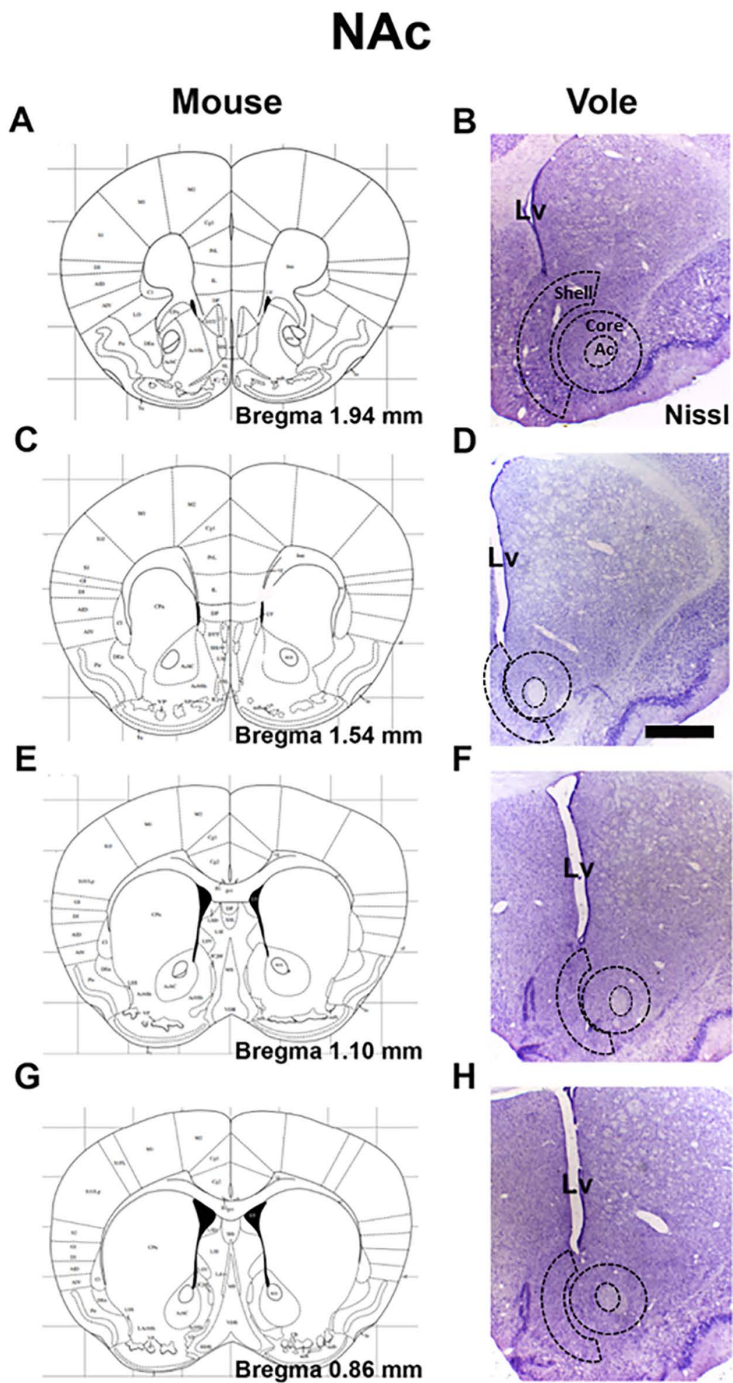

**Fig 2. Anatomical references for Golgi-Cox analysis.** A, C, E, G. Schematic coronal sections illustrating nucleus accumbens (NAc) core and shell boundaries at representative Bregma levels, adapted from [53] mouse atlas. B, D, F, H. These coordinates guided the selection of female vole brain sections for Golgi-Cox processing. Nissl staining. Ac: anterior commissure. Lv: lateral ventricle. Scale bar: 200  $\mu$ m.

<https://doi.org/10.1371/journal.pone.0335626.g002>

### MSN dendritic spines density

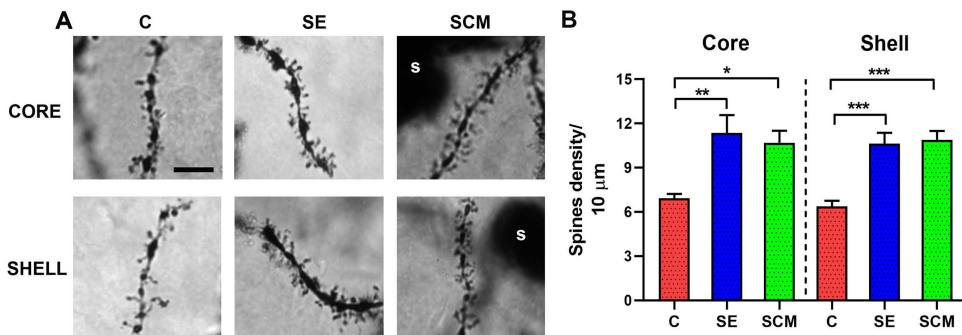

**Fig 3. Dendritic-spine density in NAc core and shell.** A. Representative Golgi-Cox micrographs (100x; scale bar=5 μm) of medium spiny neurons (MSNs) from Control (C), Social Exposure (SE), and Social cohabitation with mating (SCM) groups. s: neuron soma. B. Quantification of spine density in secondary dendrites (10 μm segments). Data was analyzed with One-way ANOVA, followed by Bonferroni's tests. \*  $p < 0.05$ ; \*\*  $p < 0.01$ ; \*\*\*  $p < 0.001$  vs C.

<https://doi.org/10.1371/journal.pone.0335626.g003>

**Total dendritic-spine density.** Across the NAc, both male sensory exposure and cohabitation with mating were associated with higher MSN spine density relative to controls (Fig 3B). In the core, one-way ANOVA detected a significant group effect on total spine density  $F_{(2,12)} = 7.78$ ,  $p = 0.0068$ ,  $\eta^2 = 0.56$ ; *post hoc* test showed increased in SE ( $p = 0.009$ ) and SCM ( $p = 0.027$ ) vs. C. In the shell, spine density also differed among experimental groups  $F_{(2,12)} = 23.27$ ,  $p < 0.0001$ ,  $\eta^2 = 0.79$ , with SE and SCM females showed again higher density than C ( $p = 0.0003$ ;  $p = 0.0002$ ; respectively, Fig 3B and Table 2).

#### Spine-subtype composition and density

To determine whether specific spine classes drove these effects, we classified spines as branched, mushroom, filopodia, long-thin, thin, or stubby [42]. Fig 4A illustrates subtype identification on a representative secondary dendrite. Fig 4B, C provides stacked summaries of subtype distribution in core and shell, respectively. Fig 4D, E shows density (spines per 10 μm) by subtype; Fig 4F reports percentages.

In the NAc core, two types varied by group (Fig 4D): mushroom spines,  $F_{(2,12)} = 8.22$ ,  $p = 0.006$ ,  $\eta^2 = 0.57$  and long-thin spines,  $F_{(2,12)} = 4.99$ ,  $p = 0.026$ ,  $\eta^2 = 0.45$ . Neurons from the SE group had more mature mushroom neurons than C females ( $p = 0.005$ ). Conversely, C and SCM prairie voles showed higher long-thin densities than SE ( $p = 0.046$  and  $p = 0.042$ ). Table 2.

Densities of filopodia, thin, stubby and branched spines did not differ. Similarly, spine-type percentages in the core did not vary significantly across groups.

By contrast, the shell showed selective increase in long-thin, stubby and branched spines densities (Fig 4E and Table 2; long-thin:  $F_{(2,12)} = 5.33$ ,  $p = 0.022$ ,  $\eta^2 = 0.47$ ; stubby:  $F_{(2,12)} = 4.97$ ,  $p = 0.026$ ,  $\eta^2 = 0.45$ ; branched:  $F_{(2,12)} = 4.8$ ,  $p = 0.029$ ,  $\eta^2 = 0.44$ ). *Post-hoc* test indicated that females from the SCM had higher density than C for each subtype ( $p = 0.04$ ,  $0.045$ ,  $0.043$ ). Filopodia, thin, and mushroom densities did not differ.

For percentage (Fig 4F), long-thin, stubby, and branched spines varied across group ( $F_{(2,12)} = 4.75$ ,  $p = 0.03$ ,  $\eta^2 = 0.44$ ;  $F_{(2,12)} = 5.05$ ,  $p = 0.025$ ,  $\eta^2 = 0.46$ ;  $F_{(2,12)} = 4.74$ ,  $p = 0.03$ ,  $\eta^2 = 0.44$ ). *Post hoc* analysis reported that the percentage in SCM exceeded C for long-thin and stubby ( $p = 0.046$ ,  $p = 0.048$ ), whereas SE exceeded C for branched ( $p = 0.039$ ). Percentages of filopodia, thin and mushroom did not differ.

**Table 2. Summary of the differences in MSN in the total spine density, spine subtype density, and morphological parameters in the NAc.**

| Synaptic parameter                    | NAc subarea   |                |
|---------------------------------------|---------------|----------------|
|                                       | Core          | Shell          |
| <b>MSN morphological parameter</b>    |               |                |
| <b>Total spine density</b>            | ↑↑ SE (vs C)  | ↑↑↑ SE (vs C)  |
|                                       | ↑ SCM (vs C)  | ↑↑↑ SCM (vs C) |
| <b>Spine subtype density</b>          |               |                |
| <b>Long-thin</b>                      | ↑ C (vs SE)   | ↑ SCM (vs C)   |
|                                       | ↑ SCM (vs SE) | ns             |
| <b>Stubby</b>                         | ns            | ↑ SCM (vs C)   |
| <b>Mushroom</b>                       | ↑↑ SE (vs C)  | ns             |
| <b>Branched</b>                       | ns            | ↑ SCM (vs C)   |
| <b>Dendritic length</b>               | ↑ SE (vs C)   | ↑↑ SE (vs C)   |
| <b>Arborization (branched points)</b> | ↑ SE (vs C)   | ↑ SE (vs C)    |
| <b>Soma diameter</b>                  | ns            | ns             |

Arrows indicate the direction of change relative between groups within each subregion. The number of arrows encodes the adjusted p-value from one-way ANOVA with Bonferroni post-hoc test comparisons:

↑ increase,  $p < 0.05$  (adjusted).

↑↑ increase,  $p < 0.01$  (adjusted).

↑↑↑ increase,  $p < 0.001$  (adjusted).

n.s.: not significant after adjustment.

<https://doi.org/10.1371/journal.pone.0335626.t002>

## MSNs dendritic morphology

Representative neurons in the NAc are shown in Fig 5A. Dendritic length increased with SE female in comparison to C voles in both subregions: core,  $F_{(2,16)} = 4.05$ ,  $p = 0.037$ ,  $\eta^2 = 0.34$ ; shell,  $F_{(2,16)} = 6.39$ ,  $p = 0.009$ ,  $\eta^2 = 0.44$ . Fig 5B and Table 2. Arborization (branch points) likewise increased with SE: core  $F_{(2,16)} = 4.4$ ,  $p = 0.03$ ,  $\eta^2 = 0.35$  (SE > C,  $p = 0.035$ ); shell,  $F_{(2,16)} = 4.72$ ,  $p = 0.02$ ,  $\eta^2 = 0.37$  (SE > C,  $p = 0.02$ , Fig 5C and Table 2). Soma diameter did not differ among groups in either region. Fig 5D.

## Discussion

Sexual activity and pair-bonding are motivated behaviors orchestrated by decision-making network that includes the social-behavior network and the mesolimbic reward system [7]. Within this circuitry, the NAc regulates pair-bond formation, maintenance, and disruption in prairie voles, functional coupling between the NAc and medial prefrontal cortex drives affiliative behavior [28,54], and NAc connectivity remodels across bonding stages [55].

### 1. Global spinogenesis observed with male cues and mating

Consistent with links between spine number and synaptic plasticity [48,56], both male sensory exposure and social cohabitation with mating were associated with higher total spine density in NAc core and shell (Fig 3 and Table 2). Comparable effects have been reported after sexual experience in female Syrian hamsters, where increases were confined to the core [57,58]. Notably, SE females, who did not form pair bonds, also exhibited spine gains, indicating that exposure to male cues can coincide with accumbal spinogenesis, paralleling cue-dependent adult neurogenesis in prairie voles [9,59]. We therefore interpret SE-related spine increases as compatible with social-cue-evoked plasticity.

### 2. Region-specific functional implications

NAc shell plasticity has been implicated in partner-preference learning:  $\mu$ -opioid receptor blockade in the dorsomedial shell prevents partner preference without affecting mating [60]. Whereas  $\kappa$ -opioid antagonism selectively increases

### MSN spine subtypes density

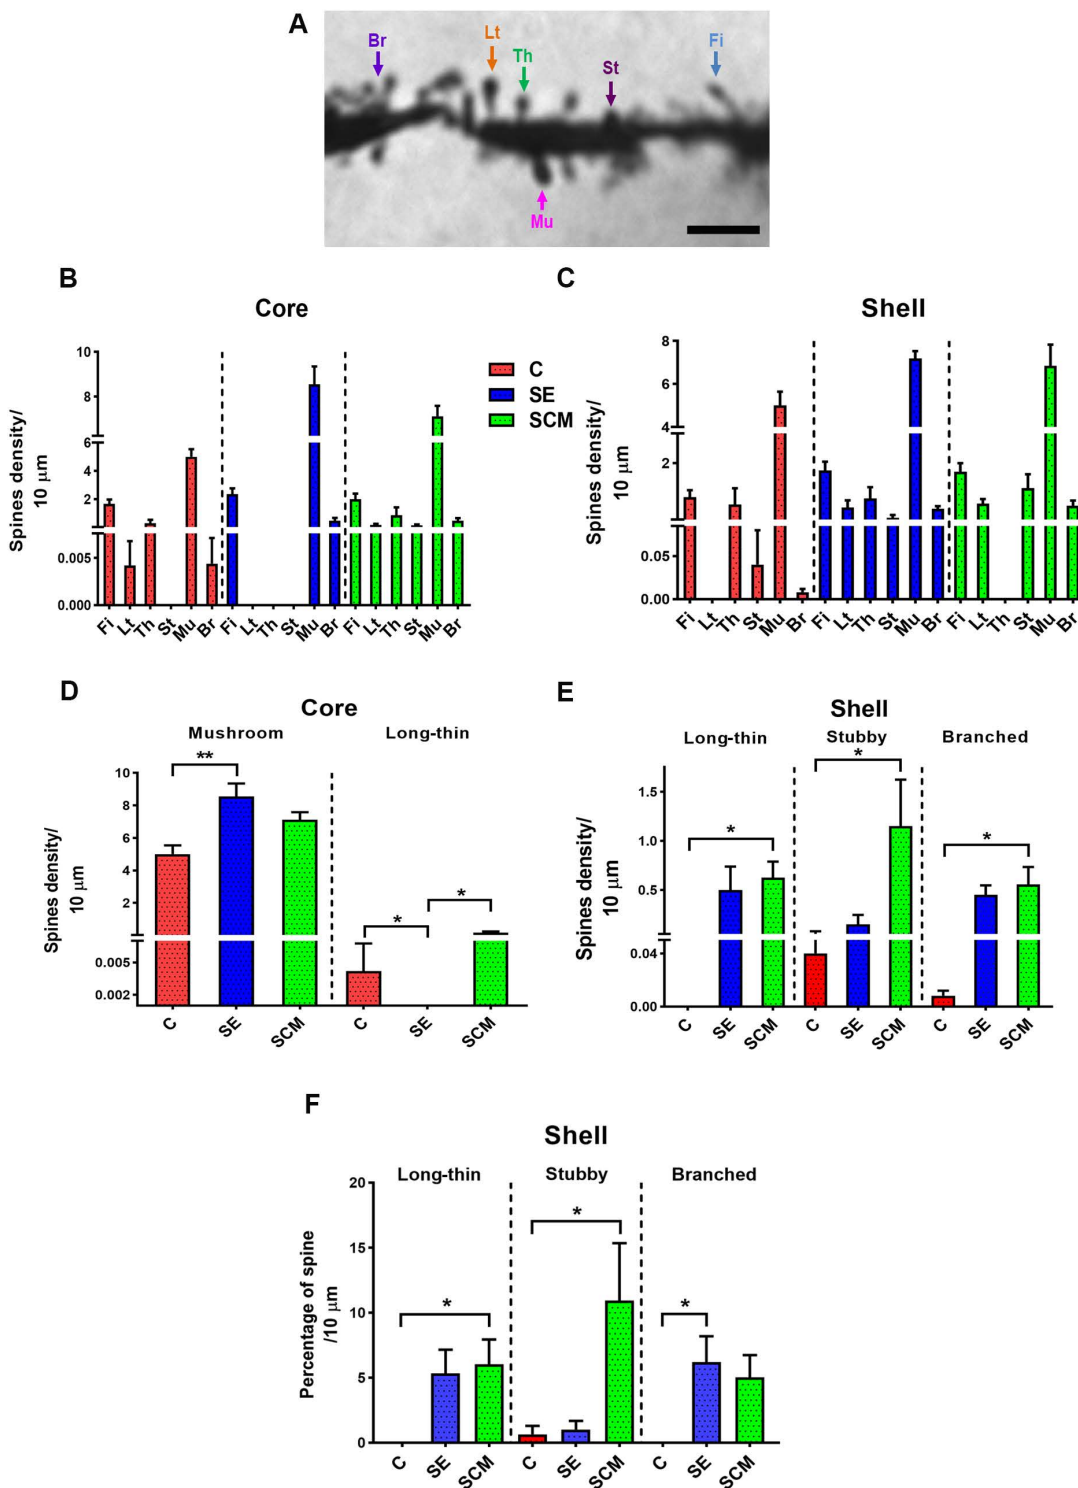

**Fig 4. Spine-subtype distribution in MSN.** A. Representative MSN dendritic segment from a SE female showing the different spine types quantified. Left to right: Br: branched. Lt: long-thin. Th: thin. Mu: mushroom. St: stubby. Fi: filopodia. Scale bar: 3  $\mu$ m. B, C. Stacked-bar depiction of absolute counts for six spine subtypes (Fi, Lt, Th, St, Mu, Br) in core (B) and shell (C). D, E. Density (spines/10  $\mu$ m) of spine subtypes exhibiting significant group effects.

F. Percentage of spine subtypes in the shell region. One-way ANOVA followed by Bonferroni's *post hoc* test. \*  $p=0.05$ ; \*\*  $p=0.01$ . Only categories with significant differences are graphed. Control (C), Social exposure (SE), and social cohabitation with mating (SCM) groups.

<https://doi.org/10.1371/journal.pone.0335626.g004>

## MSN morphological parameters

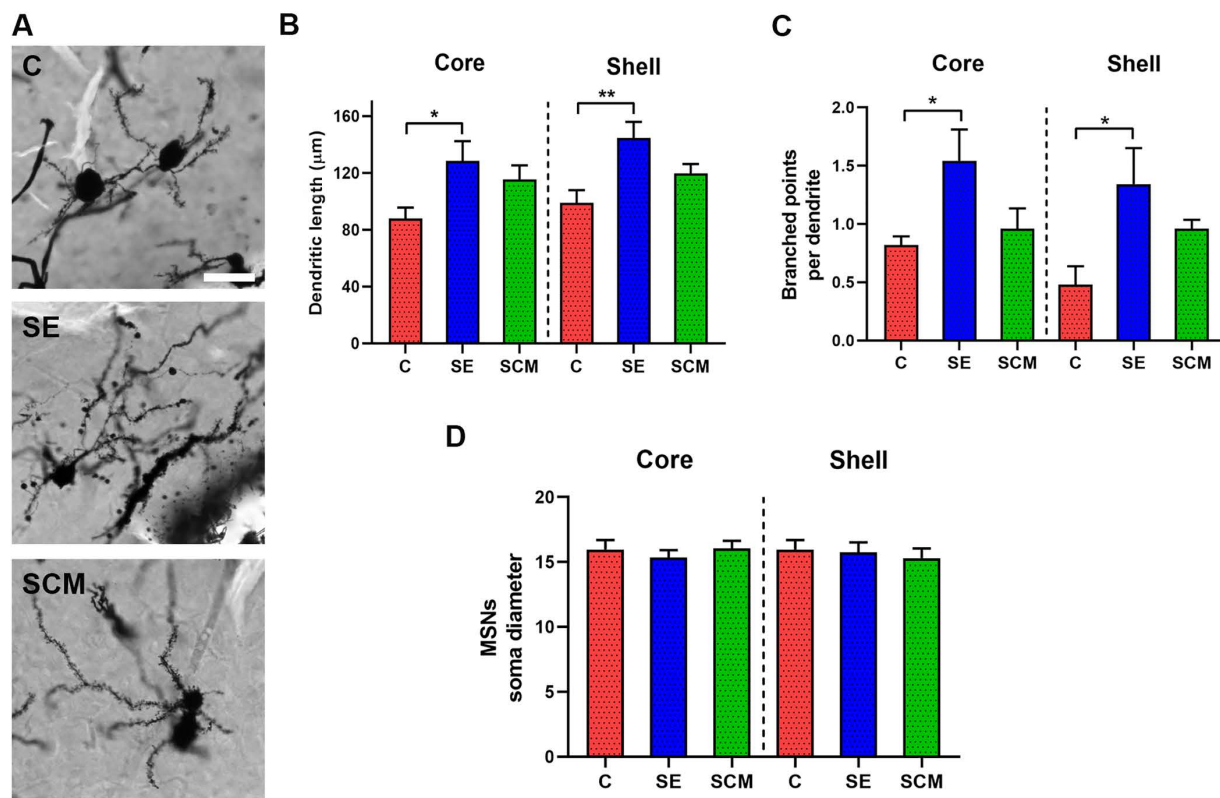

**Fig 5. Morphometric parameters of NAc MSNs.** A. Representative MSN from each group (Control (C), Social exposure (SE), and Social cohabitation with mating (SCM)), scale bar=20 µm. B-D. Mean dendritic length (B), number of branch points (arborization; C), and soma diameter (D). One-way ANOVA followed by Bonferroni's *post hoc* test. \*  $p=0.05$ ; \*\*  $p=0.01$  vs. C. Scale bar: 15 µm.

<https://doi.org/10.1371/journal.pone.0335626.g005>

aggression during bond maintenance [3]. Dopamine contributes similarly: activation of D2 receptors in the rostral shell promotes partner preference, whereas D1 receptors in both subregions support selective aggression [24,61–63]. In this context, the concomitant core and shell spine increases we observed may support both formation (shell) and consolidation/maintenance (core and shell) of the bond. We present this as a plausible alignment with prior work rather than a definitive mechanistic assignment.

### 3. Spine-subtype remodeling

Subtype analyses refine this picture. SE females showed more mushroom spines in the core and fewer long-thin spines, a pattern consistent with stabilization of synapses that encoding salient social cues [64,65]. However, because locomotor and arousal parameters were not quantified, we cannot distinguish incentive-salience-related plasticity from the effects of general behavioral activation. We therefore frame prior cue-only studies (e.g., on sexual receptivity and neurogenesis) as convergent evidence, rather than proof, of incentive encoding in our dataset.

SCM females exhibited higher densities of long-thin, stubby, and branched spines in the NAc shell and a greater proportion of long-thin and stubby subtypes. Long-thin spines are dynamic and can transition to mushroom forms; stubby spines are characteristic of heightened excitatory drive; branched spines represent mature, multiply innervated sites [43,64,66]. Together, these patterns suggest diversified synaptic remodeling associated with mating and nascent bonding. Similar subtype-specific changes occur with other motivated behaviors (sexual experience or aggression) in Syrian hamsters [58,67,68] and mating-related increases in mushroom spines have been reported in male rats [69]. Related morphologies also arise after exposure to addictive drugs or hormonal fluctuations [38,68,70], underscoring shared structural motifs across motivational states.

#### 4. Dendritic growth during male-cue exposure

In our cohort, male exposure alone coincides with longer dendrites and increased branching in both NAc subregions. Because dendritic growth expands potential synaptic territory and arborization scales with synapse formation [71], SE may prepare circuits for subsequent plasticity. Crucially, in the absence of behavioral quantification, increased dendritic complexity could also reflect elevated locomotion or exploratory drive.

#### 5. Candidate molecular mediators

Spinogenesis is orchestrated by scaffold proteins such as Postsynaptic density-95 (PSD-95), Shank and Homer [72–74]. Our unpublished observations of higher PSD-95 density in SE and SCM groups parallel the spine increase. Modulation by estradiol, dopamine, oxytocin, and opioid peptides is also well supported [37,75–78]. Although all females were ovariectomized and received identical estradiol priming, group differences persisted, suggesting contributions from non-hormonal pathways. Future work using intact females, receptor-specific manipulations (e.g., chemogenetics), or targeted gene perturbations (e.g., CRISPR interference) will be needed to delineate causal pathways.

### Limitations and future directions

**Behavioral context:** Partner-preference testing was not performed in this cohort; direct linking spine metrics to individual bonding strength remains essential. Moreover, behavior during the 6 h session was not quantified; therefore, distinctions between the incentive process and motor activation are provisional. Future work will implement blinded ethological scoring and/or automated tracking.

**Temporal scope:** The 48 h endpoint captures early pair-bond formation. Longitudinal studies should test persistence, regression or maturation of spine changes during bond maintenance and after partner loss.

**Physiological relevance:** Patch-clamp recordings will determine whether newly formed spines translate into altered excitatory drive and MSN output during social interactions.

**Imaging approach:** Morphometry was performed on 2D bright-field Golgi-Cox images rather than 3D confocal stacks. Although 2D Golgi-Cox is established for NAc MSN analyses and has revealed robust group differences, out-of-plane geometry can bias subtype assignment. We mitigated this by restricting analyses to in-plane dendrites, requiring a clearly resolvable neck/head in a single best-focus frame, applying a rule-based decision tree for subtyping, and performing blinded analyses. Even so, future studies will pair Golgi-Cox with confocal z-stacks or super-resolution and automated spine tracking to validate subtype distributions across focal planes.

### Conclusion

Exposure to male sensory cues without physical contact coincides with increased mature mushroom spine density and greater dendritic complexity in the NAc core and shell of female prairie voles, whereas cohabitation with mating is associated with subtype-specific remodeling, particularly increased long-thin, stubby, and branched spines in the shell—suggestive of region-specific adaptations relevant to bond consolidation. We propose that the NAc integrates social exposure and

mating experience as motivational signals that may stabilize social monogamy, while emphasizing that causal interpretations await behavioral quantification and mechanistic tests. Dissecting the relative roles of estradiol, dopamine, oxytocin, and opioid peptides in NAc spinogenesis remains a pivotal objective for future studies.

## Supporting information

**S1 File. Data base Castro et al (1).**  
(PDF)

## Acknowledgments

We thank Nydia Hernández, Ericka De los Ríos, Lorena Gaytán, Santiago Figueroa, Deisy Gasca, Carlos Lozano, Martín García, and Alejandra Castilla for their excellent technical assistance.

ChatGPT 5.0 was used for language editing process.

## Author contributions

**Conceptualization:** Wendy Portillo, Analía E Castro, Raúl G Paredes.

**Formal analysis:** Analía E Castro, Daniela Ávila-González.

**Funding acquisition:** Wendy Portillo, Néstor F Diaz.

**Investigation:** Analía E Castro, Daniela Ávila-González, Francisco J Camacho, Raúl G Paredes.

**Methodology:** Analía E Castro, Marco A López-Quiroz, Francisco J Camacho.

**Supervision:** Wendy Portillo, Raúl G Paredes, Néstor F Diaz.

**Writing – original draft:** Analía E Castro.

**Writing – review & editing:** Wendy Portillo, Néstor F Diaz.

## References

- Insel TR, Hulihan TJ. A gender-specific mechanism for pair bonding: oxytocin and partner preference formation in monogamous voles. *Behav Neurosci*. 1995;109(4):782–9. <https://doi.org/10.1037//0735-7044.109.4.782> PMID: [7576222](https://pubmed.ncbi.nlm.nih.gov/7576222/)
- Williams JR, Catania KC, Carter CS. Development of partner preferences in female prairie voles (*Microtus ochrogaster*): the role of social and sexual experience. *Horm Behav*. 1992;26(3):339–49. [https://doi.org/10.1016/0018-506x\(92\)90004-f](https://doi.org/10.1016/0018-506x(92)90004-f) PMID: [1398553](https://pubmed.ncbi.nlm.nih.gov/1398553/)
- Resendez SL, Kuhnmuensch M, Krzywosinski T, Aragona BJ.  $\kappa$ -Opioid receptors within the nucleus accumbens shell mediate pair bond maintenance. *J Neurosci*. 2012;32(20):6771–84. <https://doi.org/10.1523/JNEUROSCI.5779-11.2012> PMID: [22593047](https://pubmed.ncbi.nlm.nih.gov/22593047/)
- Young LJ, Wang Z. The neurobiology of pair bonding. *Nat Neurosci*. 2004;7(10):1048–54. <https://doi.org/10.1038/nn1327> PMID: [15452576](https://pubmed.ncbi.nlm.nih.gov/15452576/)
- Blumenthal SA, Young LJ. The Neurobiology of Love and Pair Bonding from Human and Animal Perspectives. *Biology (Basel)*. 2023;12(6):844. <https://doi.org/10.3390/biology12060844> PMID: [37372130](https://pubmed.ncbi.nlm.nih.gov/37372130/)
- Hiura LC, Donaldson ZR. Prairie vole pair bonding and plasticity of the social brain. *Trends Neurosci*. 2023;46(4):260–2. <https://doi.org/10.1016/j.tins.2022.10.009> PMID: [36369029](https://pubmed.ncbi.nlm.nih.gov/36369029/)
- López-Gutiérrez MF, Mejía-Chávez S, Alcauter S, Portillo W. The neural circuits of monogamous behavior. *Front Neural Circuits*. 2022;16:978344. <https://doi.org/10.3389/fncir.2022.978344> PMID: [36247729](https://pubmed.ncbi.nlm.nih.gov/36247729/)
- Jorgensen C, Wang Z. Adult neurogenesis and social behavior: A reciprocal relationship. *Masterclass in Neuroendocrinology*. Cham: Springer International Publishing; 2024. p. 131–55.
- Castro AE, Domínguez-Ordoñez R, Young LJ, Camacho FJ, Ávila-González D, Paredes RG, et al. Pair-bonding and social experience modulate new neurons survival in adult male and female prairie voles (*Microtus ochrogaster*). *Front Neuroanat*. 2022;16:987229. <https://doi.org/10.3389/fnana.2022.987229> PMID: [36189119](https://pubmed.ncbi.nlm.nih.gov/36189119/)
- Castro AE, Young LJ, Camacho FJ, Paredes RG, Diaz NF, Portillo W. Effects of Mating and Social Exposure on Cell Proliferation in the Adult Male Prairie Vole (*Microtus ochrogaster*). *Neural Plast*. 2020;2020:8869669. <https://doi.org/10.1155/2020/8869669> PMID: [33029122](https://pubmed.ncbi.nlm.nih.gov/33029122/)
- Mavridis IN. Deep brain stimulation for psychiatric disorders: Are nucleus accumbens and medial forebrain bundle two branches of the same tree? *Neurosci Biobehav Rev*. 2015;56:345–6. <https://doi.org/10.1016/j.neubiorev.2015.03.015> PMID: [25861855](https://pubmed.ncbi.nlm.nih.gov/25861855/)

12. Szumlinski KK, Thompson DL, Renton RM, Ary AW, Lominac KD. Enduring dysregulation of nucleus accumbens catecholamine and glutamate transmission by developmental exposure to phenylpropranolamine. *Brain Res.* 2020;1748:147098. <https://doi.org/10.1016/j.brainres.2020.147098> PMID: [32896521](https://pubmed.ncbi.nlm.nih.gov/32896521/)
13. Marinescu AM, Labouesse MA. The nucleus accumbens shell: a neural hub at the interface of homeostatic and hedonic feeding. *Front Neurosci.* 2024;18:1437210.
14. Yan H, Shlobin NA, Jung Y, Zhang KK, Warsi N, Kulkarni AV, et al. Nucleus accumbens: a systematic review of neural circuitry and clinical studies in healthy and pathological states. *J Neurosurg.* 2022;138(2):337–46. <https://doi.org/10.3171/2022.5.JNS212548> PMID: [35901682](https://pubmed.ncbi.nlm.nih.gov/35901682/)
15. Xu Y, Lin Y, Yu M, Zhou K. The nucleus accumbens in reward and aversion processing: insights and implications. *Front Behav Neurosci.* 2024;18:1420028. <https://doi.org/10.3389/fnbeh.2024.1420028> PMID: [39184934](https://pubmed.ncbi.nlm.nih.gov/39184934/)
16. Parkinson JA, Olmstead MC, Burns LH, Robbins TW, Everitt BJ. Dissociation in effects of lesions of the nucleus accumbens core and shell on appetitive pavlovian approach behavior and the potentiation of conditioned reinforcement and locomotor activity by D-amphetamine. *J Neurosci.* 1999;19(6):2401–11. <https://doi.org/10.1523/JNEUROSCI.19-06-02401.1999> PMID: [10066290](https://pubmed.ncbi.nlm.nih.gov/10066290/)
17. Parkinson JA, Willoughby PJ, Robbins TW, Everitt BJ. Disconnection of the anterior cingulate cortex and nucleus accumbens core impairs Pavlovian approach behavior: further evidence for limbic cortical-ventral striatopallidal systems. *Behav Neurosci.* 2000;114(1):42–63. <https://doi.org/10.1037//0735-7044.114.1.42> PMID: [10718261](https://pubmed.ncbi.nlm.nih.gov/10718261/)
18. Meredith GE, Baldo BA, Andrezewski ME, Kelley AE. The structural basis for mapping behavior onto the ventral striatum and its subdivisions. *Brain Struct Funct.* 2008;213(1–2):17–27. <https://doi.org/10.1007/s00429-008-0175-3> PMID: [18256852](https://pubmed.ncbi.nlm.nih.gov/18256852/)
19. Trezza V, Damsteegt R, Achterberg EJM, Vanderschuren LJM. Nucleus accumbens  $\mu$ -opioid receptors mediate social reward. *J Neurosci.* 2011;31(17):6362–70. <https://doi.org/10.1523/JNEUROSCI.5492-10.2011> PMID: [21525276](https://pubmed.ncbi.nlm.nih.gov/21525276/)
20. Di Chiara G, Bassareo V, Fenu S, De Luca MA, Spina L, Cadoni C, et al. Dopamine and drug addiction: the nucleus accumbens shell connection. *Neuropharmacology.* 2004;47 Suppl 1:227–41. <https://doi.org/10.1016/j.neuropharm.2004.06.032> PMID: [15464140](https://pubmed.ncbi.nlm.nih.gov/15464140/)
21. Wise RA. Dopamine, learning and motivation. *Nat Rev Neurosci.* 2004;5(6):483–94. <https://doi.org/10.1038/nrn1406> PMID: [15152198](https://pubmed.ncbi.nlm.nih.gov/15152198/)
22. Kelley AE. Ventral striatal control of appetitive motivation: role in ingestive behavior and reward-related learning. *Neurosci Biobehav Rev.* 2004;27(8):765–76. <https://doi.org/10.1016/j.neubiorev.2003.11.015> PMID: [15019426](https://pubmed.ncbi.nlm.nih.gov/15019426/)
23. Young LJ, Murphy Young AZ, Hammock EAD. Anatomy and neurochemistry of the pair bond. *J Comp Neurol.* 2005;493(1):51–7. <https://doi.org/10.1002/cne.20771> PMID: [16255009](https://pubmed.ncbi.nlm.nih.gov/16255009/)
24. Aragona BJ, Liu Y, Yu YJ, Curtis JT, Detwiler JM, Insel TR, et al. Nucleus accumbens dopamine differentially mediates the formation and maintenance of monogamous pair bonds. *Nat Neurosci.* 2006;9(1):133–9. <https://doi.org/10.1038/nn1613> PMID: [16327783](https://pubmed.ncbi.nlm.nih.gov/16327783/)
25. Scribner JL, Vance EA, Protter DSW, Sheeran WM, Saslow E, Cameron RT, et al. A neuronal signature for monogamous reunion. *Proc Natl Acad Sci U S A.* 2020;117(20):11076–84. <https://doi.org/10.1073/pnas.1917287117> PMID: [32381740](https://pubmed.ncbi.nlm.nih.gov/32381740/)
26. Curtis JT, Liu Y, Aragona BJ, Wang Z. Dopamine and monogamy. *Brain Res.* 2006;1126(1):76–90. <https://doi.org/10.1016/j.brainres.2006.07.126> PMID: [16950234](https://pubmed.ncbi.nlm.nih.gov/16950234/)
27. Forero SA, Sailer LL, Girçy t  A, Madrid JE, Sullivan N, Ophir AG. Motherhood and DREADD manipulation of the nucleus accumbens weaken established pair bonds in female prairie voles. *Horm Behav.* 2023;151:105351. <https://doi.org/10.1016/j.yhbeh.2023.105351> PMID: [37003159](https://pubmed.ncbi.nlm.nih.gov/37003159/)
28. Pierce AF, Protter DSW, Watanabe YL, Chapel GD, Cameron RT, Donaldson ZR. Nucleus accumbens dopamine release reflects the selective nature of pair bonds. *Curr Biol.* 2024;34(3):519–530.e5. <https://doi.org/10.1016/j.cub.2023.12.041> PMID: [38218185](https://pubmed.ncbi.nlm.nih.gov/38218185/)
29. Keebaugh AC, Young LJ. Increasing oxytocin receptor expression in the nucleus accumbens of pre-pubertal female prairie voles enhances alloparental responsiveness and partner preference formation as adults. *Horm Behav.* 2011;60(5):498–504. <https://doi.org/10.1016/j.yhbeh.2011.07.018> PMID: [21851821](https://pubmed.ncbi.nlm.nih.gov/21851821/)
30. Keebaugh AC, Barrett CE, Laprairie JL, Jenkins JJ, Young LJ. RNAi knockdown of oxytocin receptor in the nucleus accumbens inhibits social attachment and parental care in monogamous female prairie voles. *Soc Neurosci.* 2015;10(5):561–70. <https://doi.org/10.1080/17470919.2015.1040893> PMID: [25874849](https://pubmed.ncbi.nlm.nih.gov/25874849/)
31. Liu Y, Curtis JT, Wang Z. Vasopressin in the lateral septum regulates pair bond formation in male prairie voles (*Microtus ochrogaster*). *Behav Neurosci.* 2001;115(4):910–9. <https://doi.org/10.1037//0735-7044.115.4.910> PMID: [11508730](https://pubmed.ncbi.nlm.nih.gov/11508730/)
32. Soares-Cunha C, de Vasconcelos NAP, Coimbra B, Domingues AV, Silva JM, Loureiro-Campos E, et al. Correction: Nucleus accumbens medium spiny neurons subtypes signal both reward and aversion. *Mol Psychiatry.* 2020;25(12):3448. <https://doi.org/10.1038/s41380-019-0525-y> PMID: [31534159](https://pubmed.ncbi.nlm.nih.gov/31534159/)
33. Taverna S, van Dongen YC, Groenewegen HJ, Pennartz CMA. Direct physiological evidence for synaptic connectivity between medium-sized spiny neurons in rat nucleus accumbens in situ. *J Neurophysiol.* 2004;91(3):1111–21. <https://doi.org/10.1152/jn.00892.2003> PMID: [14573550](https://pubmed.ncbi.nlm.nih.gov/14573550/)
34. Ebihara K, Yamamoto K, Ueda K, Koshikawa N, Kobayashi M. Cholinergic interneurons suppress action potential initiation of medium spiny neurons in rat nucleus accumbens shell. *Neuroscience.* 2013;236:332–44. <https://doi.org/10.1016/j.neuroscience.2013.01.012> PMID: [23380504](https://pubmed.ncbi.nlm.nih.gov/23380504/)
35. Briones BA, Tang VD, Haye AE, Gould E. Response learning stimulates dendritic spine growth on dorsal striatal medium spiny neurons. *Neurobiol Learn Mem.* 2018;155:50–9. <https://doi.org/10.1016/j.nlm.2018.06.008> PMID: [29908973](https://pubmed.ncbi.nlm.nih.gov/29908973/)
36. Allichon M-C, Ortiz V, Pousinha P, Andrianarivelo A, Petitbon A, Heck N, et al. Cell-Type-Specific Adaptions in Striatal Medium-Sized Spiny Neurons and Their Roles in Behavioral Responses to Drugs of Abuse. *Front Synaptic Neurosci.* 2021;13:799274. <https://doi.org/10.3389/fnsyn.2021.799274> PMID: [34970134](https://pubmed.ncbi.nlm.nih.gov/34970134/)

37. Thompson BL, Oscar-Berman M, Kaplan GB. Opioid-induced structural and functional plasticity of medium-spiny neurons in the nucleus accumbens. *Neurosci Biobehav Rev*. 2021;120:417–30. <https://doi.org/10.1016/j.neubiorev.2020.10.015> PMID: [33152423](#)
38. Marie N, Canestrelli C, Noble F. Transfer of neuroplasticity from nucleus accumbens core to shell is required for cocaine reward. *PLoS One*. 2012;7(1):e30241. <https://doi.org/10.1371/journal.pone.0030241> PMID: [22272316](#)
39. Alcantara AA, Lim HY, Floyd CE, Garcés J, Mendenhall JM, Lyons CL, et al. Cocaine- and morphine-induced synaptic plasticity in the nucleus accumbens. *Synapse*. 2011;65(4):309–20. <https://doi.org/10.1002/syn.20849> PMID: [20730804](#)
40. Kim J, Park B-H, Lee JH, Park SK, Kim J-H. Cell type-specific alterations in the nucleus accumbens by repeated exposures to cocaine. *Biol Psychiatry*. 2011;69(11):1026–34. <https://doi.org/10.1016/j.biopsych.2011.01.013> PMID: [21377654](#)
41. Robinson TE, Kolb B. Structural plasticity associated with exposure to drugs of abuse. *Neuropharmacology*. 2004;47 Suppl 1:33–46. <https://doi.org/10.1016/j.neuropharm.2004.06.025> PMID: [15464124](#)
42. Rice JP, Suggs LE, Lusk AV, Parker MO, Candelaria-Cook FT, Akers KG, et al. Effects of exposure to moderate levels of ethanol during pre-natal brain development on dendritic length, branching, and spine density in the nucleus accumbens and dorsal striatum of adult rats. *Alcohol*. 2012;46(6):577–84. <https://doi.org/10.1016/j.alcohol.2011.11.008> PMID: [22749340](#)
43. Bourne JN, Harris KM. Balancing structure and function at hippocampal dendritic spines. *Annu Rev Neurosci*. 2008;31:47–67. <https://doi.org/10.1146/annurev.neuro.31.060407.125646> PMID: [18284372](#)
44. Chidambaram SB, Rathipriya AG, Bolla SR, Bhat A, Ray B, Mahalakshmi AM, et al. Dendritic spines: Revisiting the physiological role. *Prog Neuropsychopharmacol Biol Psychiatry*. 2019;92:161–93. <https://doi.org/10.1016/j.pnpbp.2019.01.005> PMID: [30654089](#)
45. Choi JE, Kaang B-K. Increased social interaction in Shank2-deficient mice following acute social isolation. *Mol Brain*. 2023;16(1):35. <https://doi.org/10.1186/s13041-023-01025-x> PMID: [37061705](#)
46. Sorra KE, Harris KM. Overview on the structure, composition, function, development, and plasticity of hippocampal dendritic spines. *Hippocampus*. 2000;10(5):501–11. [https://doi.org/10.1002/1098-1063\(2000\)10:5<501::AID-HIPO1>3.0.CO;2-T](https://doi.org/10.1002/1098-1063(2000)10:5<501::AID-HIPO1>3.0.CO;2-T) PMID: [11075821](#)
47. Risher WC, Ustunkaya T, Singh Alvarado J, Eroglu C. Rapid Golgi analysis method for efficient and unbiased classification of dendritic spines. *PLoS One*. 2014;9(9):e107591. <https://doi.org/10.1371/journal.pone.0107591> PMID: [25208214](#)
48. Spiga S, Talani G, Mulas G, Licheri V, Fois GR, Muggironi G, et al. Hampered long-term depression and thin spine loss in the nucleus accumbens of ethanol-dependent rats. *Proc Natl Acad Sci U S A*. 2014;111(35):E3745–54. <https://doi.org/10.1073/pnas.1406768111> PMID: [25122682](#)
49. Mahalakshmi AM, Ray B, Tuladhar S, Hediyaal TA, Raj P, Rathipriya AG, et al. Impact of Pharmacological and Non-Pharmacological Modulators on Dendritic Spines Structure and Functions in Brain. *Cells*. 2021;10(12):3405. <https://doi.org/10.3390/cells10123405> PMID: [34943913](#)
50. Smale L, Nelson RJ, Zucker I. Neuroendocrine responsiveness to oestradiol and male urine in neonatally androgenized prairie voles (*Microtus ochrogaster*). *J Reprod Fertil*. 1985;74(2):491–6. <https://doi.org/10.1530/jrf.0.0740491> PMID: [3900382](#)
51. Roberts RL, Cushing BS, Carter CS. Intraspecific variation in the induction of female sexual receptivity in prairie voles. *Physiol Behav*. 1998;64(2):209–12. [https://doi.org/10.1016/s0031-9384\(98\)00042-0](https://doi.org/10.1016/s0031-9384(98)00042-0) PMID: [9662088](#)
52. Ulloa M, Portillo W, Díaz NF, Young LJ, Camacho FJ, Rodríguez VM, et al. Mating and social exposure induces an opioid-dependent conditioned place preference in male but not in female prairie voles (*Microtus ochrogaster*). *Horm Behav*. 2018;97:47–55. <https://doi.org/10.1016/j.yhbeh.2017.10.015> PMID: [29111331](#)
53. Franklin KBJ, Paxinos G. Paxinos and Franklin's the mouse brain in stereotaxic coordinates, compact. 5th ed. San Diego, CA: Academic Press; 2019.
54. Amadei EA, Johnson ZV, Jun Kwon Y, Shpiner AC, Saravanan V, Mays WD, et al. Dynamic corticostriatal activity biases social bonding in monogamous female prairie voles. *Nature*. 2017;546(7657):297–301. <https://doi.org/10.1038/nature22381> PMID: [28562592](#)
55. López-Gutiérrez MF, Gracia-Tabuenca Z, Ortiz JJ, Camacho FJ, Young LJ, Paredes RG, et al. Brain functional networks associated with social bonding in monogamous voles. *Elife*. 2021;10:e55081. <https://doi.org/10.7554/eLife.55081> PMID: [33443015](#)
56. Berry KP, Nedivi E. Spine Dynamics: Are They All the Same? *Neuron*. 2017;96(1):43–55. <https://doi.org/10.1016/j.neuron.2017.08.008> PMID: [28957675](#)
57. Meisel RL, Mullins AJ. Sexual experience in female rodents: cellular mechanisms and functional consequences. *Brain Res*. 2006;1126(1):56–65. <https://doi.org/10.1016/j.brainres.2006.08.050> PMID: [16978593](#)
58. Staffend NA, Mohr MA, DonCarlos LL, Sisk CL. A decrease in the addition of new cells in the nucleus accumbens and prefrontal cortex between puberty and adulthood in male rats. *Dev Neurobiol*. 2014;74(6):633–42. <https://doi.org/10.1002/dneu.22160> PMID: [24339170](#)
59. Ávila-González D, Romero-Morales I, Caro L, Martínez-Juárez A, Young LJ, Camacho-Barríos F, et al. Increased proliferation and neuronal fate in prairie vole brain progenitor cells cultured in vitro: effects by social exposure and sexual dimorphism. *Biol Sex Differ*. 2023;14(1):77. <https://doi.org/10.1186/s13293-023-00563-2> PMID: [37919790](#)
60. Resendez SL, Dome M, Gormley G, Franco D, Nevárez N, Hamid AA, et al.  $\mu$ -Opioid receptors within subregions of the striatum mediate pair bond formation through parallel yet distinct reward mechanisms. *J Neurosci*. 2013;33(21):9140–9. <https://doi.org/10.1523/JNEUROSCI.4123-12.2013> PMID: [23699524](#)
61. Gingrich B, Liu Y, Cascio C, Wang Z, Insel TR. Dopamine D2 receptors in the nucleus accumbens are important for social attachment in female prairie voles (*Microtus ochrogaster*). *Behav Neurosci*. 2000;114(1):173–83. <https://doi.org/10.1037//0735-7044.114.1.173> PMID: [10718272](#)

62. Aragona BJ, Liu Y, Curtis JT, Stephan FK, Wang Z. A critical role for nucleus accumbens dopamine in partner-preference formation in male prairie voles. *J Neurosci*. 2003;23(8):3483–90. <https://doi.org/10.1523/JNEUROSCI.23-08-03483.2003> PMID: [12716957](https://pubmed.ncbi.nlm.nih.gov/12716957/)
63. Aragona BJ, Wang Z. Opposing regulation of pair bond formation by cAMP signaling within the nucleus accumbens shell. *J Neurosci*. 2007;27(48):13352–6. <https://doi.org/10.1523/JNEUROSCI.3216-07.2007> PMID: [18045929](https://pubmed.ncbi.nlm.nih.gov/18045929/)
64. Pchitskaya E, Bezprozvanny I. Dendritic Spines Shape Analysis-Classification or Clusterization? Perspective. *Front Synaptic Neurosci*. 2020;12:31. <https://doi.org/10.3389/fnsyn.2020.00031> PMID: [33117142](https://pubmed.ncbi.nlm.nih.gov/33117142/)
65. Zaccard CR, Gippo I, Song A, Geula C, Penzes P. Dendritic spinule-mediated structural synaptic plasticity: Implications for development, aging, and psychiatric disease. *Front Mol Neurosci*. 2023;16:1059730. <https://doi.org/10.3389/fnmol.2023.1059730> PMID: [36741924](https://pubmed.ncbi.nlm.nih.gov/36741924/)
66. Runge K, Cardoso C, de Chevigny A. Dendritic Spine Plasticity: Function and Mechanisms. *Front Synaptic Neurosci*. 2020;12:36. <https://doi.org/10.3389/fnsyn.2020.00036> PMID: [32982715](https://pubmed.ncbi.nlm.nih.gov/32982715/)
67. Meisel RL, Joppa MA. Conditioned place preference in female hamsters following aggressive or sexual encounters. *Physiol Behav*. 1994;56(5):1115–8. [https://doi.org/10.1016/0031-9384\(94\)90352-2](https://doi.org/10.1016/0031-9384(94)90352-2) PMID: [7824580](https://pubmed.ncbi.nlm.nih.gov/7824580/)
68. Staffend NA, Meisel RL. Aggressive experience increases dendritic spine density within the nucleus accumbens core in female Syrian hamsters. *Neuroscience*. 2012;227:163–9. <https://doi.org/10.1016/j.neuroscience.2012.09.064> PMID: [23041760](https://pubmed.ncbi.nlm.nih.gov/23041760/)
69. Hernández-González M, Barrera-Cobos FJ, Hernández-Arteaga E, González-Burgos I, Flores-Soto M, Guevara MA, et al. Sexual experience induces a preponderance of mushroom spines in the medial prefrontal cortex and nucleus accumbens of male rats. *Behav Brain Res*. 2023;447:114437. <https://doi.org/10.1016/j.bbr.2023.114437> PMID: [37059188](https://pubmed.ncbi.nlm.nih.gov/37059188/)
70. Forlano PM, Woolley CS. Quantitative analysis of pre- and postsynaptic sex differences in the nucleus accumbens. *J Comp Neurol*. 2010;518(8):1330–48. <https://doi.org/10.1002/cne.22279> PMID: [20151363](https://pubmed.ncbi.nlm.nih.gov/20151363/)
71. Kolb B, Whishaw IQ. Brain plasticity and behavior. *Annu Rev Psychol*. 1998;49:43–64. <https://doi.org/10.1146/annurev.psych.49.1.43> PMID: [9496621](https://pubmed.ncbi.nlm.nih.gov/9496621/)
72. Cane M, Maco B, Knott G, Holtmaat A. The relationship between PSD-95 clustering and spine stability in vivo. *J Neurosci*. 2014;34(6):2075–86. <https://doi.org/10.1523/JNEUROSCI.3353-13.2014> PMID: [24501349](https://pubmed.ncbi.nlm.nih.gov/24501349/)
73. Maiti P, Manna J, Ilavazhagan G, Rossignol J, Dunbar GL. Molecular regulation of dendritic spine dynamics and their potential impact on synaptic plasticity and neurological diseases. *Neurosci Biobehav Rev*. 2015;59:208–37. <https://doi.org/10.1016/j.neubiorev.2015.09.020> PMID: [26562682](https://pubmed.ncbi.nlm.nih.gov/26562682/)
74. El-Husseini AE, Schnell E, Chetkovich DM, Nicoll RA, Brecht DS. PSD-95 involvement in maturation of excitatory synapses. *Science*. 2000;290(5495):1364–8. <https://doi.org/10.1126/science.290.5495.1364> PMID: [11082065](https://pubmed.ncbi.nlm.nih.gov/11082065/)
75. Cannizzaro C, Talani G, Brancato A, Mulas G, Spiga S, De Luca MA, et al. Dopamine Restores Limbic Memory Loss, Dendritic Spine Structure, and NMDAR-Dependent LTD in the Nucleus Accumbens of Alcohol-Withdrawn Rats. *J Neurosci*. 2019;39(5):929–43. <https://doi.org/10.1523/JNEUROSCI.1377-18.2018> PMID: [30446531](https://pubmed.ncbi.nlm.nih.gov/30446531/)
76. Becker HC, King CE, Griffin WC. Oxytocin reduces alcohol self-administration and stress-induced alcohol relapse behavior in mice. *Alcohol*. 2017;60:218. <https://doi.org/10.1016/j.alcohol.2017.02.250>
77. Proaño SB, Miller CK, Krentzel AA, Dorris DM, Meitzen J. Sex steroid hormones, the estrous cycle, and rapid modulation of glutamatergic synapse properties in the striatal brain regions with a focus on 17 $\beta$ -estradiol and the nucleus accumbens. *Steroids*. 2024;201:109344. <https://doi.org/10.1016/j.steroids.2023.109344> PMID: [37979822](https://pubmed.ncbi.nlm.nih.gov/37979822/)
78. Peterson BM, Mermelstein PG, Meisel RL. Estradiol mediates dendritic spine plasticity in the nucleus accumbens core through activation of mGluR5. *Brain Struct Funct*. 2015;220(4):2415–22. <https://doi.org/10.1007/s00429-014-0794-9> PMID: [24878822](https://pubmed.ncbi.nlm.nih.gov/24878822/)
